# Supplementary material
Source: publisher figshare collection journal article supplement (https://sage.figshare.com/ndownloader/files/12440570)
Supplement: Supplementary file 1 [file 12440570]

**Supplementary Table 1** Results of success follow-up and essential information of corresponding patients

| No. | Sex    | Age | Year | FB           | Site  | Dur. | Perforation | DM | HP(*)   |
|-----|--------|-----|------|--------------|-------|------|-------------|----|---------|
| 1   | female | 78  | 2012 | jujube pit   | upper | 5h   | No          | No | No      |
| 2   | male   | 44  | 2012 | boney FB     | upper | 24h  | No          | No | No      |
| 3   | female | 38  | 2012 | jujube pit   | upper | 6h   | No          | No | No      |
| 4   | male   | 28  | 2012 | fish bone    | mid   | 24h  | No          | No | No      |
| 5   | female | 81  | 2012 | jujube pit   | upper | 24h  | No          | No | No      |
| 6   | female | 35  | 2013 | metal        | mid   | 16h  | Yes         | No | No      |
| 7   | male   | 39  | 2014 | chicken bone | mid   | 24h  | No          | No | No      |
| 8   | female | 52  | 2015 | jujube pit   | mid   | 10h  | No          | No | No      |
| 9   | female | 43  | 2015 | fish bone    | upper | 24h  | No          | No | No      |
| 10  | female | 63  | 2015 | jujube pit   | mid   | 14h  | No          | No | Yes(30) |
| 11  | female | 52  | 2015 | jujube pit   | upper | 6h   | No          | No | Yes(2)  |
| 12  | male   | 52  | 2016 | jujube pit   | upper | 5h   | No          | No | No      |
| 13  | female | 61  | 2016 | jujube pit   | upper | 7h   | No          | No | No      |
| 14  | female | 64  | 2017 | jujube pit   | upper | 6h   | No          | No | Yes(2)  |

\* years of hypertension

Dur. duration; FB, foreign body; DM, diabetes mellitus; HP, hypertension

n=4, the cases loss to follow-up, essential information of corresponding patients are listed in *Supplementary Table 3*.

**Supplementary Table 2** Details of patients with esophageal perforation

| No. | Sex    | Age | Year | FB           | Site  | Dur. | Evidence                      |
|-----|--------|-----|------|--------------|-------|------|-------------------------------|
| 1   | female | 61  | 2012 | jujube pit   | mid   | 7d   | contrast esophagography (CEG) |
| 2   | female | 52  | 2012 | jujube pit   | upper | 2d   | direct viewing                |
| 3*  | female | 79  | 2012 | jujube pit   | NA    | 3d   | computed tomography (CT)      |
| 4   | female | 71  | 2012 | pig bone     | upper | 17h  | direct viewing                |
| 5   | male   | 57  | 2012 | cullet       | mid   | 24h  | CT                            |
| 6   | female | 77  | 2012 | jujube pit   | mid   | 4d   | direct viewing                |
| 7   | male   | 77  | 2012 | chicken bone | mid   | 2d   | direct viewing/CT             |
| 8   | female | 50  | 2012 | jujube pit   | upper | 5h   | CT/ barium meal               |
| 9   | female | 35  | 2013 | metal        | mid   | 16h  | CT/CEG                        |
| 10  | female | 57  | 2013 | jujube pit   | mid   | 12h  | CEG                           |
| 11  | male   | 29  | 2013 | chicken bone | mid   | 5d   | CT                            |
| 12  | male   | 44  | 2013 | denture      | lower | 5d   | direct viewing                |
| 13  | male   | 44  | 2013 | duck bone    | upper | 24h  | CT/direct viewing             |
| 14  | female | 27  | 2014 | duck bone    | mid   | 6d   | direct viewing                |
| 15  | male   | 49  | 2014 | chicken bone | mid   | 2d   | direct viewing                |
| 16  | female | 59  | 2014 | jujube pit   | upper | 3d   | CT/direct viewing             |
| 17  | male   | 64  | 2014 | jujube pit   | upper | 7d   | CT                            |
| 18  | female | 59  | 2014 | egg shell    | upper | 3d   | direct viewing                |
| 19  | male   | 84  | 2015 | jujube pit   | mid   | 52h  | direct viewing/CT             |
| 20  | male   | 79  | 2015 | jujube pit   | mid   | 5d   | CEG / barium meal             |
| 21  | female | 64  | 2015 | jujube pit   | upper | 7d   | direct viewing                |
| 22  | male   | 42  | 2015 | ox bone      | lower | 3d   | CT/direct viewing             |
| 23* | female | 70  | 2015 | fish bone    | mid   | 12h  | direct viewing                |
| 24  | male   | 83  | 2015 | jujube pit   | mid   | 3d   | CT/ direct viewing            |
| 25  | female | 21  | 2015 | duck bone    | mid   | 2d   | CT/direct viewing             |
| 26  | male   | 69  | 2015 | jujube pit   | mid   | 4d   | direct viewing                |
| 27  | male   | 84  | 2015 | denture      | mid   | 60h  | direct viewing                |
| 28  | male   | 58  | 2015 | denture      | mid   | 24h  | direct viewing                |
| 29  | female | 64  | 2015 | jujube pit   | upper | 5d   | direct viewing/ CEG           |
| 30  | female | 77  | 2016 | jujube pit   | mid   | 6d   | direct viewing/ CEG           |
| 31  | male   | 59  | 2016 | fish bone    | mid   | 24h  | direct viewing/ CT            |
| 32  | male   | 45  | 2016 | jujube pit   | mid   | 24h  | CT/ direct viewing            |
| 33  | female | 75  | 2016 | jujube pit   | upper | 24h  | CT                            |
| 34  | female | 49  | 2017 | fish bone    | mid   | 24h  | direct viewing                |
| 35  | female | 69  | 2017 | jujube pit   | upper | 10d  | direct viewing                |

\*, excluded case due to without complete data.

Dur., duration of foreign bodies; CT

**Supplementary Table 3** Details of patients excluded from STUDY POPULATIONS

| No.             | Sex    | Age | Symptom                    | Temp. | H./weight | DM  | HBP | FB type             | Dur. | Site  | Perforation | Cause                   |
|-----------------|--------|-----|----------------------------|-------|-----------|-----|-----|---------------------|------|-------|-------------|-------------------------|
| 1               | female | 61  | NA                         | NA    | 158/63    | yes | no  | <i>jujube pit</i> * | NA   | NA    | NA          | Unconfirmed diagnosis   |
| 2               | male   | 36  | dysphagia/<br>odynophagia  | NA    | 175/75    | no  | no  | <i>duck bone</i> *  | 4h   | NA    | NA          | Unconfirmed diagnosis   |
| 3               | female | 67  | dysphagia/<br>odynophagia  | 36.7  | 160/50    | yes | no  | jujube pit          | 15d  | upper | NA          | Unconfirmed perforation |
| 4               | female | 22  | FB sensation/<br>dysphagia | 38.9  | 150/65    | no  | no  | jujube pit          | 3d   | upper | NA          | Unconfirmed perforation |
| 5               | male   | 66  | chest pain                 | 36.9  | 175/73    | no  | no  | fish bone           | 4d   | NA    | NA          | Unconfirmed perforation |
| 6 <sup>†</sup>  | female | 79  | dysphagia/<br>odynophagia  | 38.3  | 165/55    | NA  | NA  | jujube pit          | 3d   | NA    | yes         | Case with missing data  |
| 7               | female | 62  | NA                         | NA    | 163/60    | no  | yes | food remnants       | NA   | lower | no          | Case with missing data  |
| 8               | female | 69  | chest pain                 | 36.3  | 170/NA    | no  | yes | jujube pit          | 5d   | mid   | no          | Case with missing data  |
| 9 <sup>†</sup>  | male   | 27  | dysphagia/<br>odynophagia  | 36.6  | 160/65    | NA  | NA  | cullet              | 2d   | mid   | no          | Case with missing data  |
| 10              | female | 70  | chest pain                 | 36.7  | NA/70     | no  | yes | fish bone           | 12h  | mid   | yes         | Case with missing data  |
| 11 <sup>†</sup> | male   | 61  | dysphagia/<br>odynophagia  | 36.4  | 167/61    | NA  | NA  | jujube pit          | 3d   | upper | no          | Case with missing data  |
| 12 <sup>†</sup> | female | 37  | dysphagia/<br>odynophagia  | 36.6  | 160/50    | NA  | NA  | duck bone           | 24h  | upper | no          | Case with missing data  |

\* , unconfirmed FBs

<sup>†</sup> the cases without information on history of diseases and loss to follow-up

NA, Not Available; Temp., temperature; H. height; DM, diabetes mellitus; HP, hypertension; Dur., duration of foreign bodies

**Supplementary Table 4** Analysis for group jujube pits

| Variables          | Total cohort | EFB without Perforation | EFB with Perforation | P Value | OR(95% CI)         |
|--------------------|--------------|-------------------------|----------------------|---------|--------------------|
| <i>N (%)</i>       | 156          | 139(89.1)               | 17(10.9)             |         |                    |
| <i>Temp.(M)</i>    | 36.7         | 36.6                    | 37.4                 | 0.001   |                    |
| IQR                | 36.5-36.9    | 36.5-36.8               | 36.8-37.8            |         |                    |
| >37.3℃             | 22           | 12                      | 10                   | <0.001  | 14.62(4.19-54.88)  |
| <i>Duration(M)</i> | 16.5         | 13                      | 96                   | <0.001  | -                  |
| IQR                | 8.0-37.5     | 8-24                    | 48-144               |         |                    |
| >24 hours          | 40           | 27                      | 13                   | <0.001  | 13.18(3.70-59.92)  |
| <i>symptoms</i>    |              |                         |                      |         |                    |
| FB sensation       | 54           | 53                      | 1                    | 0.008   | 0.007(0.002-0.697) |
| chest pain         | 7            | 4                       | 3                    | 0.029   | 7.06 (0.94-46.61)  |
| <i>Site*</i>       |              |                         |                      | -       | -                  |
| Upper              | 100          | 92                      | 8                    |         |                    |
| Mid                | 54           | 45                      | 9                    |         |                    |
| Lower              | 2            | 2                       | 0                    |         |                    |
| <i>Diabetes</i>    | 11           | 6                       | 5                    | <0.001  | 8.99(1.88-41.70)   |

Temp. temperature; M, median; IQR, interquartile range; FB, foreign body; EFB, esophageal foreign body; OR, odds ratios; CI, confidence interval

\* Upper,  $\leq 18$  cm from incisor; Mid,  $> 18$  cm and  $\leq 32$  cm from incisor; Lower,  $> 32$  cm from incisor

## Inclusion in analysis

Detailed information about inclusion and exclusion is mentioned in METHODS and shown in

**Figure 1.** Twelve patients had to be excluded from STUDY POPULATIONS for three main reasons:

- A. *Unconfirmed diagnosis:* Diagnosis of "EFB" is shown in the final diagnosis in two cases, but lacked detailed information on EFB such as symptom, diagnosis, treatment. The first patient was a 71-year-old female, who tumbled forwards and fractured her left patella on the way to hospital due to EFB. The second, a 36-year-old male, was discharged within 24 hours without any examination because of discrepancies in medical insurance information.
- B. *Unconfirmed perforation:* Three cases lacked sufficient evidence to judge whether complicated by perforation. The first, a 67-year-old female, with "not rule out the possibility of perforation" mentioned in surgical record, but no further postoperative examination was performed to confirm the presence of perforation. The second patient was a 22-year-old female with mental retardation, who was under suspicion of esophageal perforation due to persistent fever and leukocytosis after gastroscopy, although no clear perforation was found. However, further examination to determine whether complicated by perforation was refused. The last, a 66-year-old male, thoracotomy was underwent directly in the case of without any examination to prove the presence of perforation to remove FB, and whether complicated by perforation was not recorded in surgical record.
- C. *No completed data available:* There were 7 cases without complete data for analysis, more details were listed in **Supplementary Table 3**. A 62-year-old female patient with a history of achalasia for 44 years, diagnosed with EFB based on food remnants in lower esophagus was found and cleared for twice when she underwent peroral endoscopic myotomy by

endoscopy. In this case, unable to assess the duration of EFB since persistent dysphagia are caused by achalasia.
